# Supplementary material
Source: Royal Society of Chemistry journal article supplement (doi:10.1039/d6nr00050a)
Supplement: d6nr00050a3.pdf [file d6nr00050a3.pdf]

## SUPPORTING INFORMATION

### Fabrication of Biocompatible Plasmonic Sensing Platforms Via Direct Growth of Metal Nanomaterials on Modified Silk Films

Marie E. Kerns, Anika Guo, Wynn Wee, Annabella Talbott, Megan J. Downer, Teagan Hamlett, Jeremy M. Talusig, Camden S. Losey, Amanda R. Murphy, Ying Bao\*

Department of Chemistry, Western Washington University, 516 High St., Bellingham, WA 98225-9150, USA

E-mail: baoy@wwu.edu

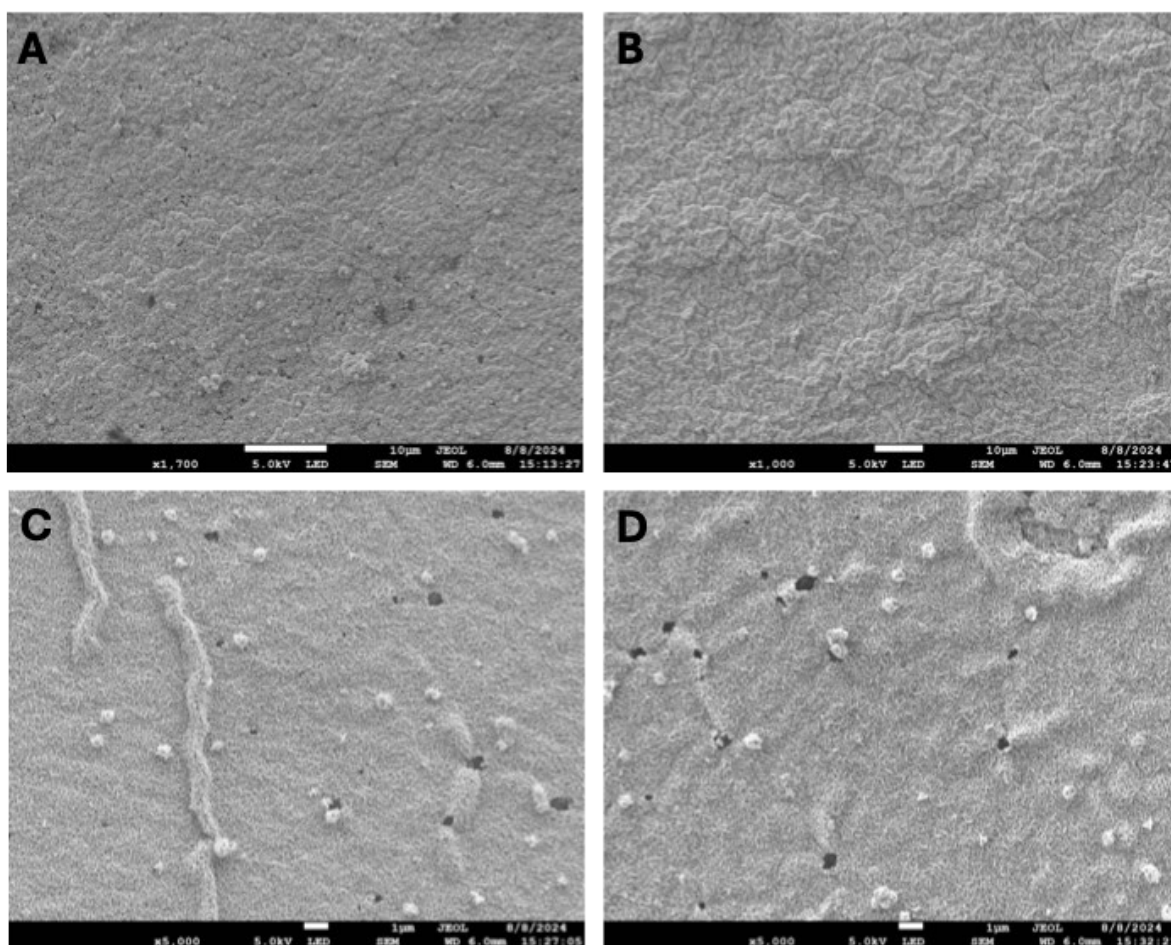

**Figure S1.** Large area SEM images of Ag@silk films with various growth times demonstrating the extent of surface coverage at each time point: (A) 5 min; (B) 10 min; (C) 15 min; (D) 20 min.
