# Supplementary material
Source: Royal Society of Chemistry journal article supplement (doi:10.1039/d6nr00050a)

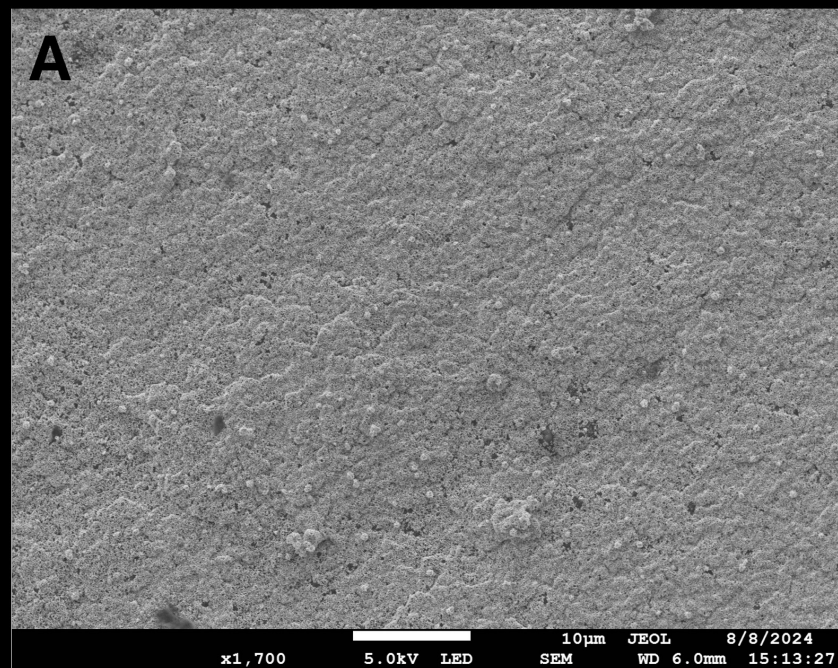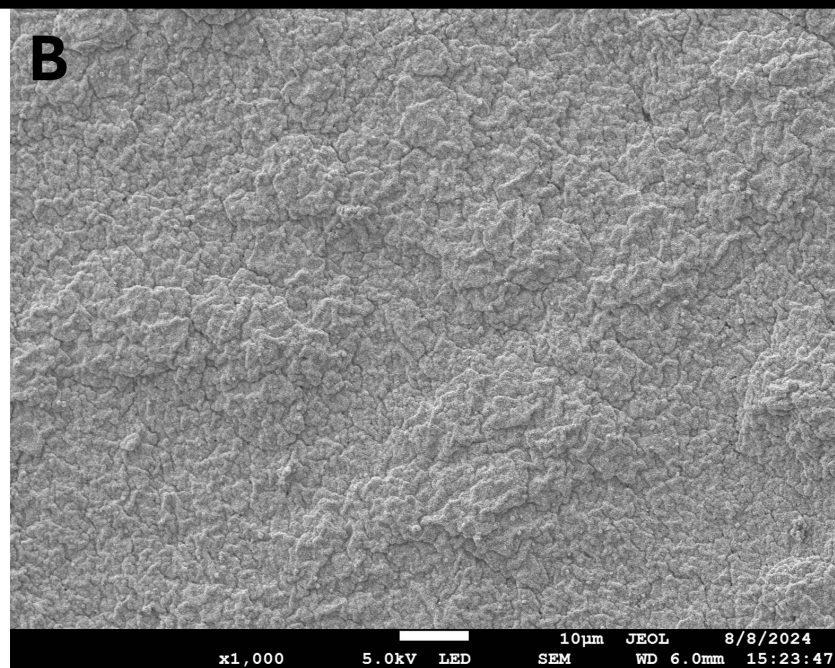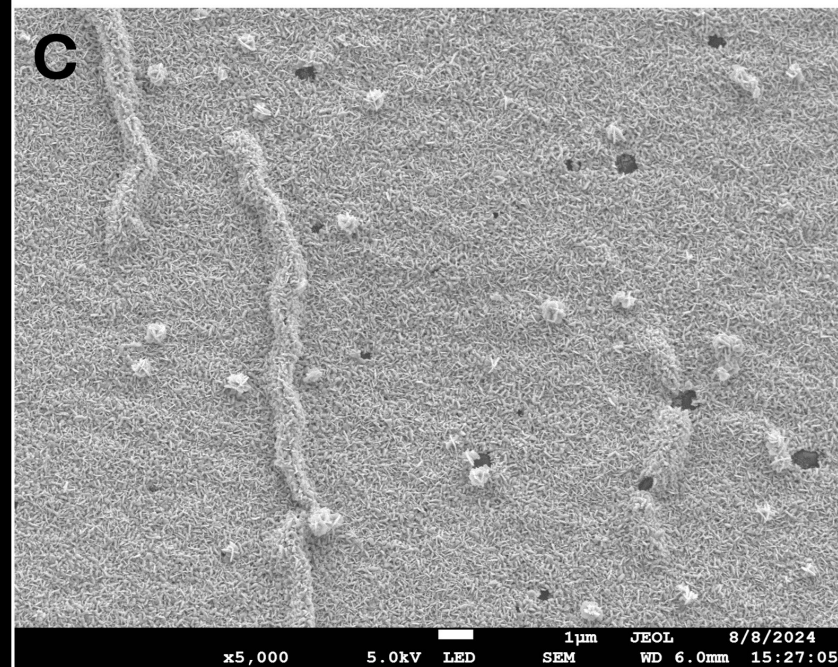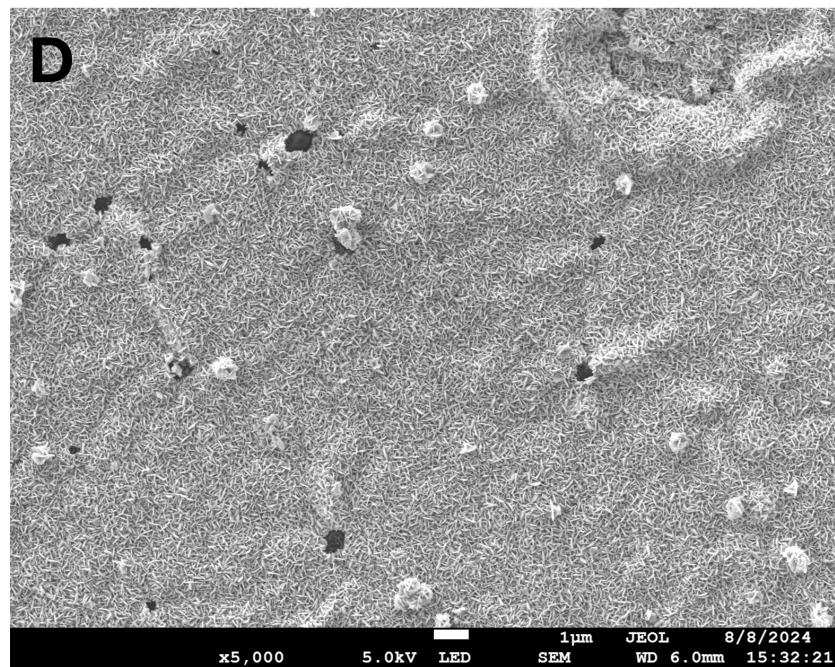

Supplement: d6nr00050a2.pdf [file d6nr00050a2.pdf]
